# Supplementary material
Source: PubMed Central journal article supplement (PMC8605927)
Supplement: NIHMS1721769-supplement-Supp_Materials.pdf [file NIHMS1721769-supplement-Supp_Materials.pdf]

**Current Biology, Volume 31**

## **Supplemental Information**

### **Reinforcement learning links spontaneous cortical dopamine impulses to reward**

**Conrad Foo, Adrian Lozada, Johnatan Aljadeff, Yulong Li, Jing W. Wang, Paul A. Slesinger, and David Kleinfeld**

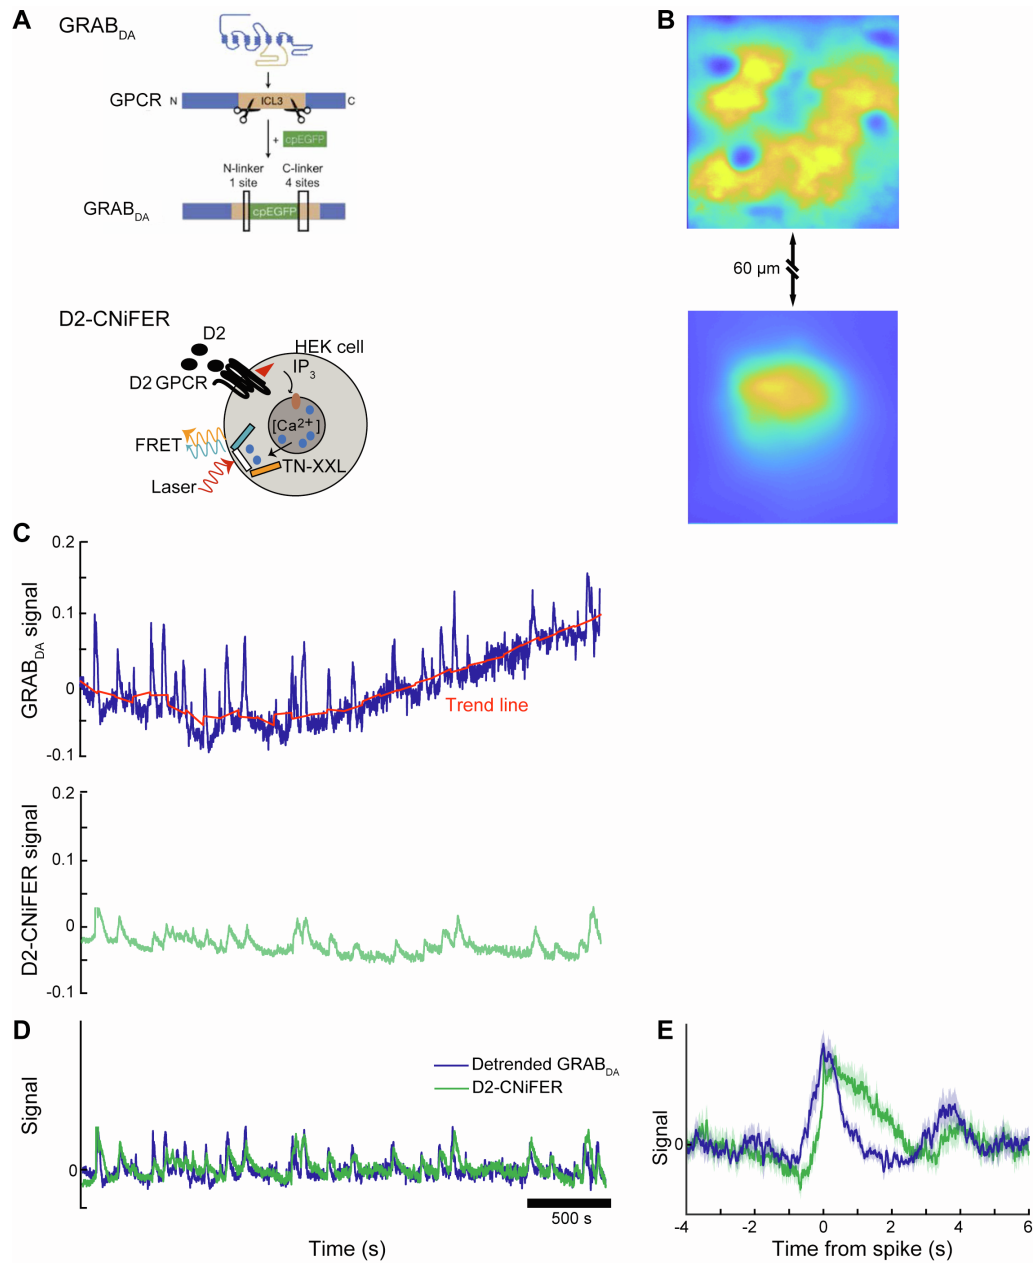

**Figure S1. Comparison of signals from genetically expressed GRAB<sub>DA</sub> and implanted D2-CNiFER cells, related to Figure 1.**

**A.** Schematic of design of the genetically expressed dopamine sensor, GRAB<sub>DA</sub>, compared to D2-CNiFERs. GRAB<sub>DA</sub> is constructed by inserting the dopamine binding site on the D2-GPCR into cpGFP. Binding of DA causes conformational changes in the binding site that effect the efficiency of fluorescence.

**B.** Averaged image showing region of GRAB<sub>DA</sub> expression and a D2-CNiFER implant. GRAB<sub>DA</sub> expression was induced using a viral vector.

**C.** Simultaneous measurement of genetically expressed GRAB<sub>DA</sub> (blue, top) and implanted D2-CNiFER cells (green, middle). A small region of interest near the center of the region of GRAB<sub>DA</sub> expression was averaged and a fluorescence trace was calculated. The GRAB<sub>DA</sub> signal had significant drift in baseline on the scale of tens of minutes, but had better signal-to-noise and temporal resolution than the D2-CNiFER signal.

**D.** Comparison of normalized detrended GRAB<sub>DA</sub> signal and normalized D2-CNiFER signal. The GRAB<sub>DA</sub> signal did not exhibit the decay tail that the D2-CNiFER signal had, and was about twice as bright; small transients that were detected by GRAB<sub>DA</sub> were not always detected by the D2-CNiFERs. Transients occurring in quick succession as observed by GRAB<sub>DA</sub> appeared as a single, longer transient when observed by D2-CNiFERs.

**E.** Normalized average transient triggered response of GRAB<sub>DA</sub> (blue) and D2-CNiFER (green) signals. The GRAB<sub>DA</sub> signal both rose and decayed more rapidly than the D2-CNiFER signal, as one would expect; the change in fluorescence in the D2-CNiFER signal requires activation of a second messenger pathway that is not necessary in GRAB<sub>DA</sub>.

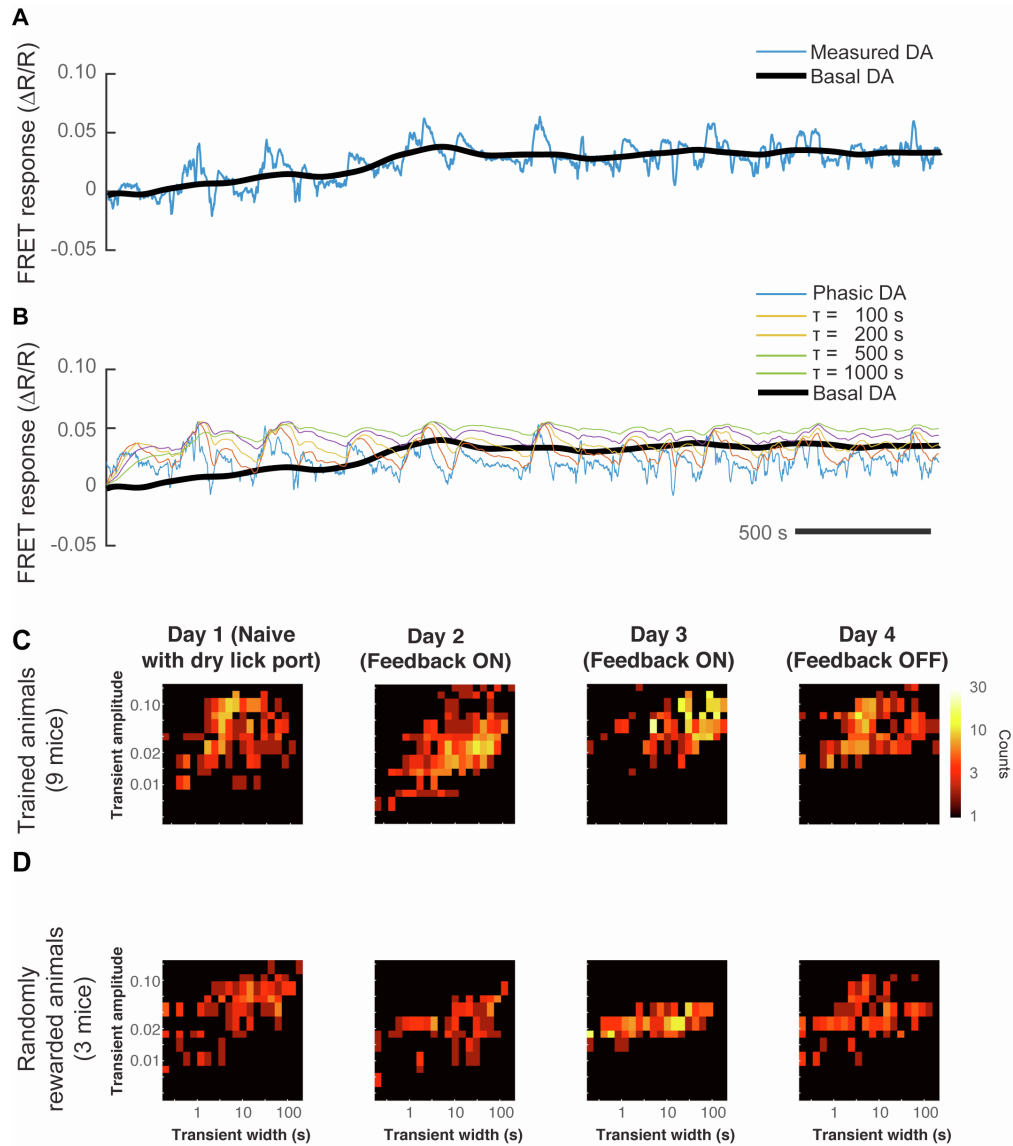

**Figure S2. Additional analysis of dopamine levels, related to Figure 3.**

**A.** Extraction of basal DA from the measured  $[DA]_{ex}$ . A LOESS fit (tricubic weighting function, linear fit) was applied to the measured signal (blue) to extract DA transients. The window size was 940 s and the step size was 11 s. The transients were subtracted from the total DA signal to get the basal DA (black).

**B.** Leaky integration of the phasic DA signal does not reproduce the ramping basal DA signal. The phasic DA signal (blue), was extracted from the measured  $[DA]_{ex}$  using a LOESS fit. A leaky integrator, with exponential decay time  $\tau$ , was applied to this signal (yellow, green) for values of  $\tau = 100$  s, 200 s, 500 s, and 1000 s. The leaky integrator fails to reproduce the shift in basal DA that we observe. Although the integrator with a half-decay time of 500 s shows a similar shift upwards in the DA response, it ramps up to this level much quicker, i.e., around 100 s, than the 1000 s that we observe (black line).

**C.** Two-dimensional histograms showing the change in dopamine transient properties over training. Transient amplitudes during Day 3 of feedback training were significantly larger than those in the naïve animal. Transient widths during both Days 2 and 3 of feedback training were significantly longer than those in the naïve animal. Transient properties when feedback was turned off on Day 4 did not significantly differ from the naïve animal. The average widths of transients were  $15.1 \pm 1.3$  s,  $25.4 \pm 2.1$  s,  $43.1 \pm 2.5$  s, and  $18.5 \pm 1.7$  s; the corresponding average amplitudes were  $0.056 \pm 0.002$ ,  $0.045 \pm 0.003$ ,  $0.081 \pm 0.004$ , and  $0.056 \pm 0.002$  for Days 1, 2, 3, and 4, respectively.

**D.** Two-dimensional histograms showing dopamine transient properties when animals were randomly rewarded. Transient width was significantly shorter on Days 3 and 4 compared to Days 1 and 2. Transient amplitudes were lower when animals rewarded compared to when they were not. The average widths of transients were  $22.4 \pm 2.1$  s,  $24.6 \pm 2.3$  s,  $13.1 \pm 1.3$  s, and  $14.7 \pm 1.6$  s; the corresponding average amplitudes were  $0.052 \pm 0.003$ ,  $0.029 \pm 0.002$ ,  $0.027 \pm 0.0005$ , and  $0.039 \pm 0.002$  for Days 1, 2, 3, and 4 respectively.

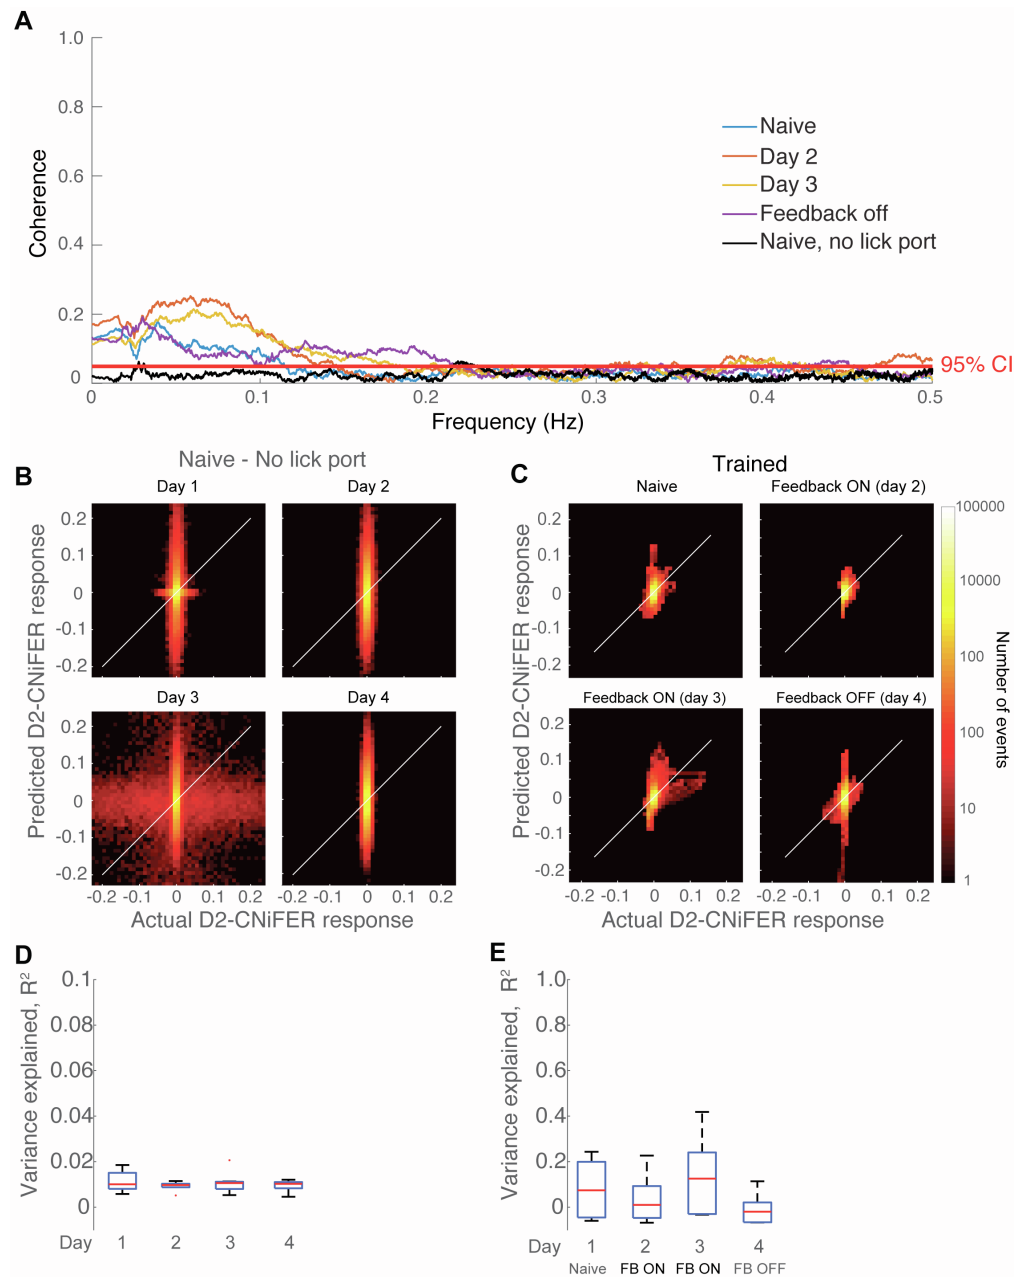

**Figure S3. Introduction of a dry lick port introduces a small correlation between running and dopamine release, related to Figure 3.**

**A.** Average spectral coherence between running and phasic dopamine release across animals (9 mice with lick port, 7 mice without lick port). In the presence of a lick port, coherence was significant at frequencies below 0.2 Hz. In the absence of a lick port, coherence was not significant. The coherence was calculated using the multi-taper method; the bandwidth was 0.02 Hz from averaging with 143 tapers.

**B.** Histograms of the predictions of a linear model of  $[DA]_{ex}$  as a function of running speed versus the measured  $[DA]_{ex}$  in the absence of a lick port during four consecutive days of experiments. White line shows the expected distribution of a perfectly predictive model. The model was fit to the data in the frequency domain, making use of the convolution theorem. Cross-spectral power was calculated with a multitaper estimate. A new model was fit for each trial; each histogram uses data from all trials within a given day of the experiment.

- C.** Same as panel B, but in the presence of a lick port. Animals were trained to increase  $[DA]_{ex}$  for these data.
- D.** Variance explained by linear model of  $[DA]_{ex}$  as a function of running speed in the absence of a lick port for different days of the experiment. This was calculated directly from the data shown in panel B. Each trial was a separate data point.  $R^2$  was  $0.011 \pm 0.005$ ,  $0.009 \pm 0.002$ ,  $0.010 \pm 0.005$ , and  $0.009 \pm 0.003$  for Days 1, 2, 3, and 4 respectively.
- E.** Same as panel D, but in the presence of a lick port.  $R^2$  was  $0.1 \pm 0.1$ ,  $0.08 \pm 0.1$ ,  $0.2 \pm 0.2$ , and  $0.04 \pm 0.07$  for naïve, Day 2 of training, Day 3 of training, and feedback OFF days respectively.
